# Supplementary material
Source: PubMed Central journal article supplement (PMC6526644)
Supplement: IMM-157-163-s001.pdf [file IMM-157-163-s001.pdf]

# Supplementary Material

## **cAIMP administration in humanized mice induces a chimerization-level-dependent STING response**

Andersen, Olesen, Jønsson, et al.

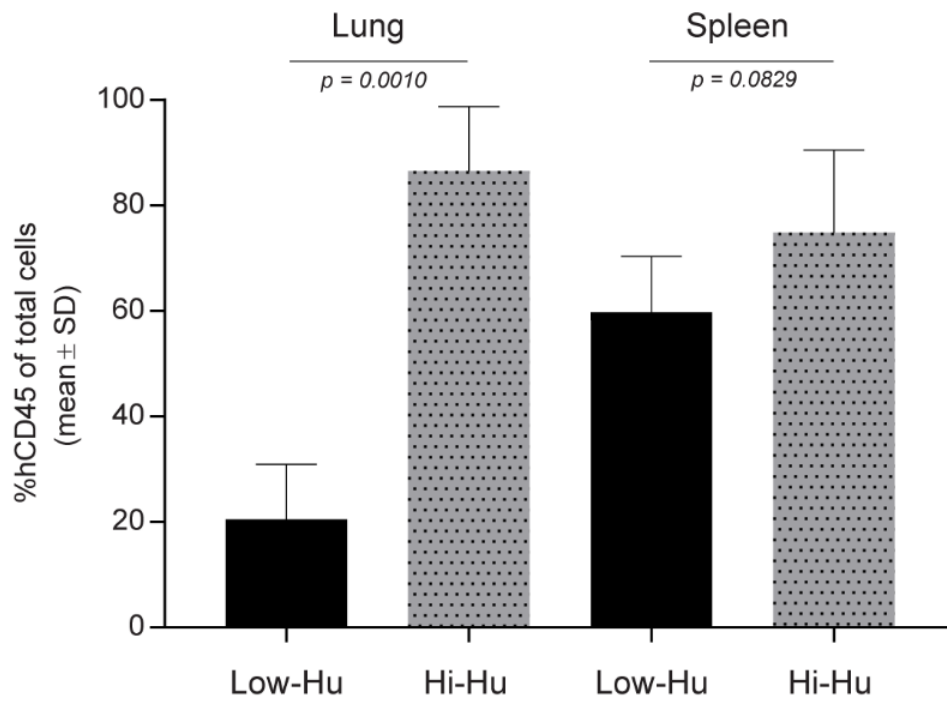

**Supplementary Figure 1**

Proportions of human CD45+ cells in total lung and spleen tissues from Low-hu and Hi-hu mice are shown as a mean of each group for each organ ( $\pm$ SD). %CD45 differences between the Low-hu and Hi-hu mice was compared with a Mann-Whitney unpaired nonparametric test.

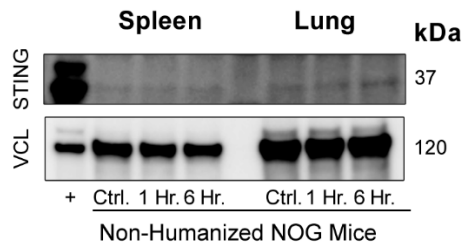

### Supplementary Figure 2

Western blot analyses are shown for STING protein as well as for vinculin (VCL) expression in splenocytes and lung cells from non-humanized NOG mice. Three non-humanized mice were administered either vehicle (Ctrl), or cAIMP and killed 1 Hr or 6Hr after administration.

**Supplementary Table 1. Frequencies of lung cell subtypes from individual Low-Hu mice**

|                                  | Time since cAIMP administration                                  | Ctrl. |      |      | 1 Hr. |      |      | 6 Hr. |      |      |
|----------------------------------|------------------------------------------------------------------|-------|------|------|-------|------|------|-------|------|------|
|                                  | <b>%CD45 of total cells</b>                                      | 45.3  | 24.4 | 17.6 | 13.6  | 16.8 | 18.5 | 24.7  | 13.5 | 10.3 |
| <b>human CD45 subpopulations</b> | % CD33bright of CD45+ cells                                      | 3.2   | 4.0  | 4.5  | 15.2  | 16.3 | 18.0 | 20.4  | 20.4 | 25.9 |
|                                  | % CD33brightCD14negCD16+ of CD45+ cells                          | 0.3   | 0.0  | 0.0  | 0.0   | 0.0  | 0.0  | 0.1   | 0.0  | 0.0  |
|                                  | % classical monocytes (CD33brightCD14+CD16neg) of CD45+ cells    | 0.7   | 2.4  | 2.7  | 9.7   | 11.5 | 12.7 | 15.7  | 14.1 | 18.2 |
|                                  | % intermediate monocytes (CD33brightCD14+CD16+) of CD45+ cells   | 0.2   | 0.1  | 0.2  | 0.6   | 0.8  | 1.2  | 0.6   | 0.3  | 0.3  |
|                                  | % nonclassical monocytes (CD33brightCD14dimCD16+) of CD45+ cells | 0.8   | 0.0  | 0.0  | 0.2   | 0.2  | 0.3  | 0.1   | 0.0  | 0.0  |
|                                  | % CD33brightCD14negCD16neg of CD45+ cells                        | 1.0   | 1.5  | 1.6  | 4.7   | 3.8  | 3.8  | 3.9   | 6.0  | 7.4  |
|                                  | % CD33dim of CD45+ cells                                         | 3.1   | 4.0  | 4.2  | 10.9  | 10.3 | 21.6 | 10.3  | 4.3  | 4.0  |
|                                  | % CD33dimCD16+CD14neg of CD45+ cells                             | 0.5   | 0.1  | 0.2  | 6.3   | 5.9  | 17.0 | 1.4   | 0.7  | 0.3  |
|                                  | % CD33dimCD14neg CD16neg of CD45+ cells                          | 1.4   | 2.1  | 2.6  | 3.1   | 2.7  | 2.0  | 3.5   | 1.5  | 1.6  |
|                                  | % CD33neg of CD45+ cells                                         | 26.7  | 8.9  | 8.3  | 12.2  | 12.5 | 17.8 | 5.2   | 2.2  | 1.7  |
